# Supplementary material
Source: publisher figshare collection journal article supplement (https://karger.figshare.com/ndownloader/files/35056996)

**Fig. S1.** Relapse free survival analysis of a specific combination of *E148Q/L110P*, *P369S/R408Q* and minor variants in the patients with solid tumour

Kaplan-Meier plots of relapse free survival in the patients with solid tumour are shown for a specific combination of *E148Q/L110P*, *P369S/R408Q* and minor variants. The Kaplan-Meier curves of patients with *E148Q/L110P* or *P369S/R408Q* but without minor variants in black, while the other patients are shown in grey. The overall survival rates and the numbers of patients were recorded near each survival curve. The + on the curve represents censoring, and the p-values (log-rank test) are shown at the bottom right of each Kaplan-Meier curve.

*p<0.01

**Fig. S1**


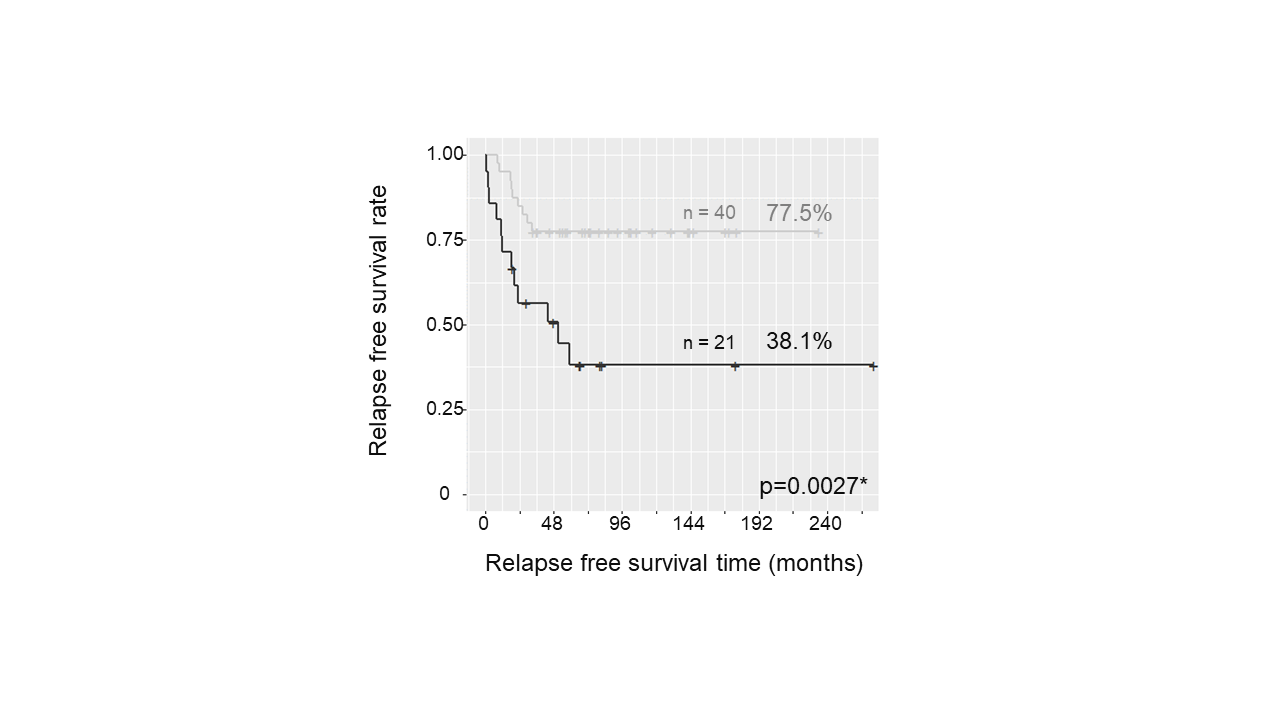

Supplement: Supplementary file 1 [file 35056996]
